# Supplementary material
Source: publisher figshare collection journal article supplement (https://acs.figshare.com/ndownloader/files/4745872)
Supplement: Supplementary file 1 [file 4745872]

## Supporting Information

for

### **[Na<sub>5</sub>(THF)<sub>10</sub>Ce(mnt)<sub>4</sub>]<sub>∞</sub>: A Honeycomb Network Polymer That Yields Homoleptic Cerium(III) Tetrakis(dithiolene) Complexes in Donor Solvents**

Eric M. Weis, Charles L. Barnes, and Paul B. Duval\*

*Department of Chemistry, University of Missouri-Columbia, 601 S. College Ave., Columbia, Missouri, 65211*

- **Figure S1: Electronic Absorption Spectrum of 1**
- **Figure S2: Excitation and Emission Spectrum of 1**

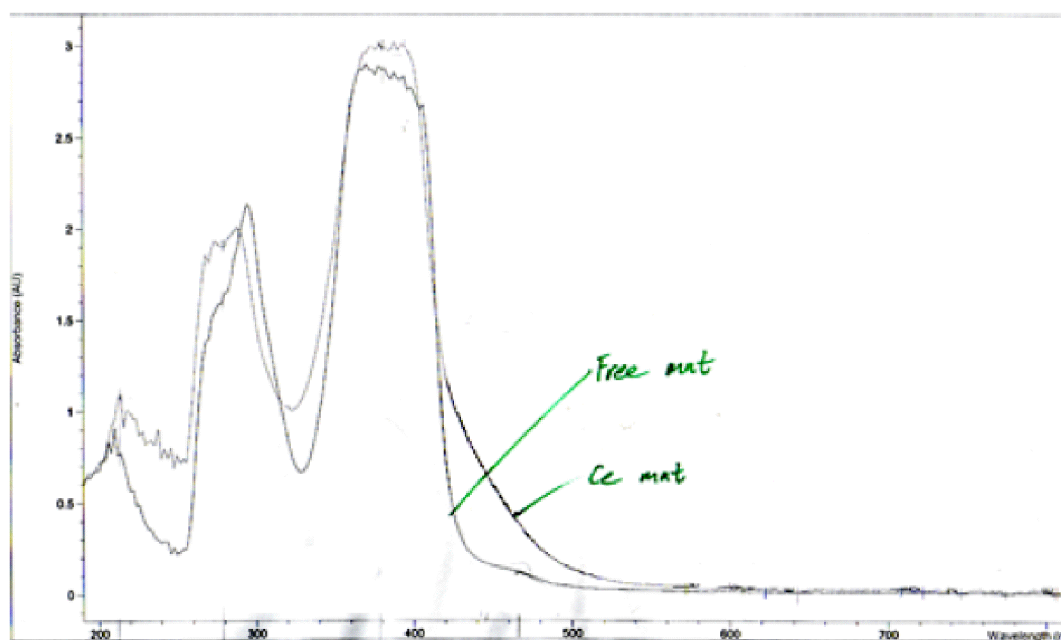

**Figure S1.** Electronic absorption spectra of **1** and the free ligand.

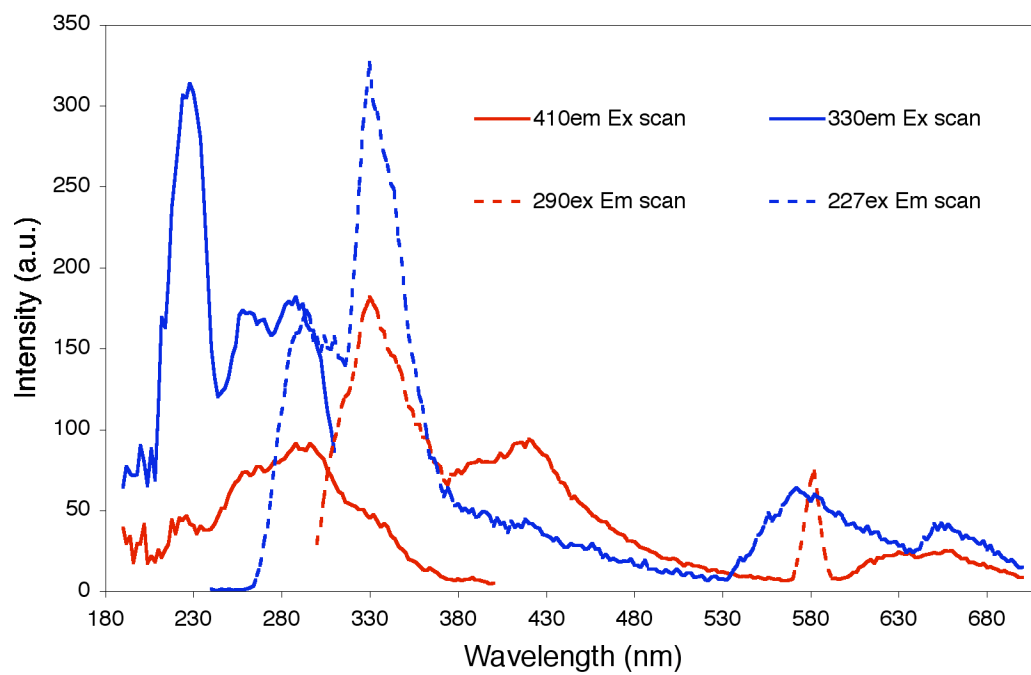

**Figure S2.** Electronic excitation and emission spectra of **1**.
